# Supplementary material
Source: PubMed Central journal article supplement (PMC2867339)

ELMO1

Dock180

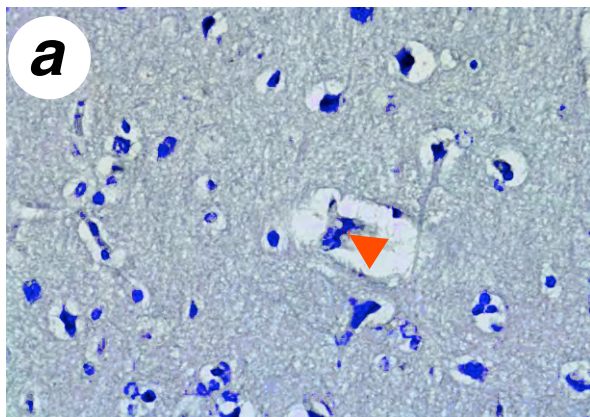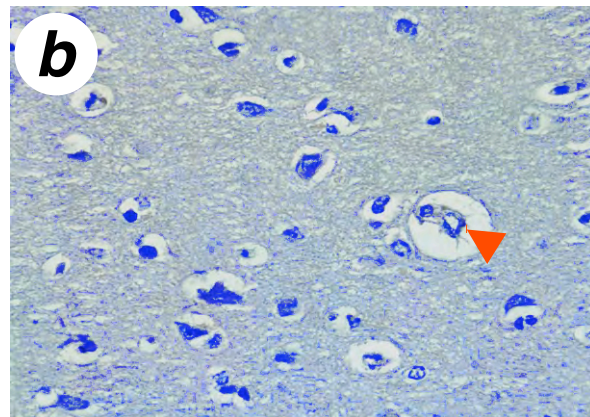

Normal Brain, J142

Center

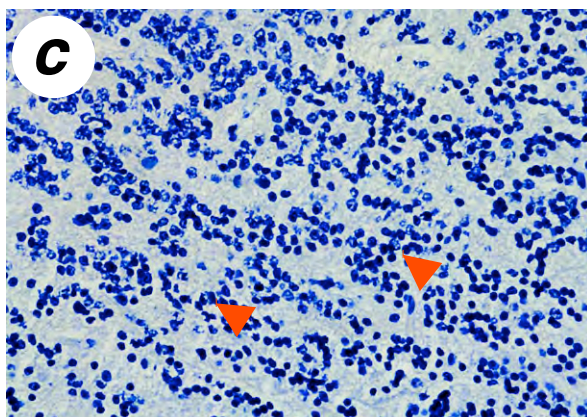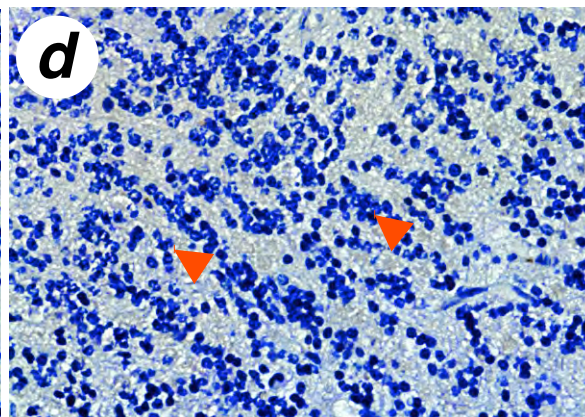

Invasion

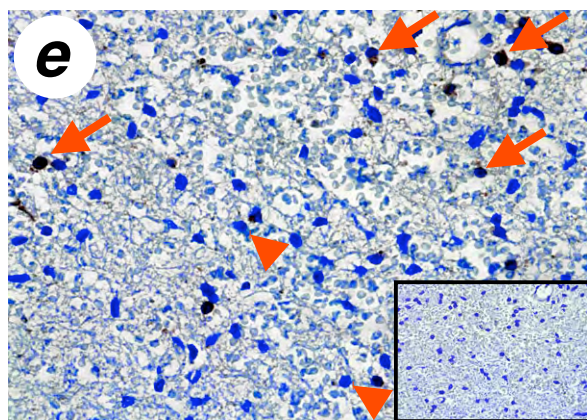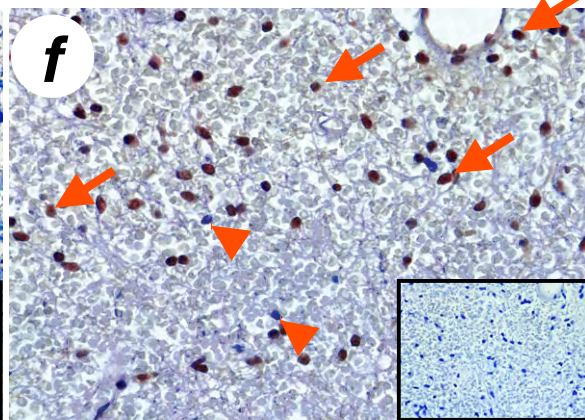

WHO Grade I, J42

Figure S1B

ELMO1

Dock180

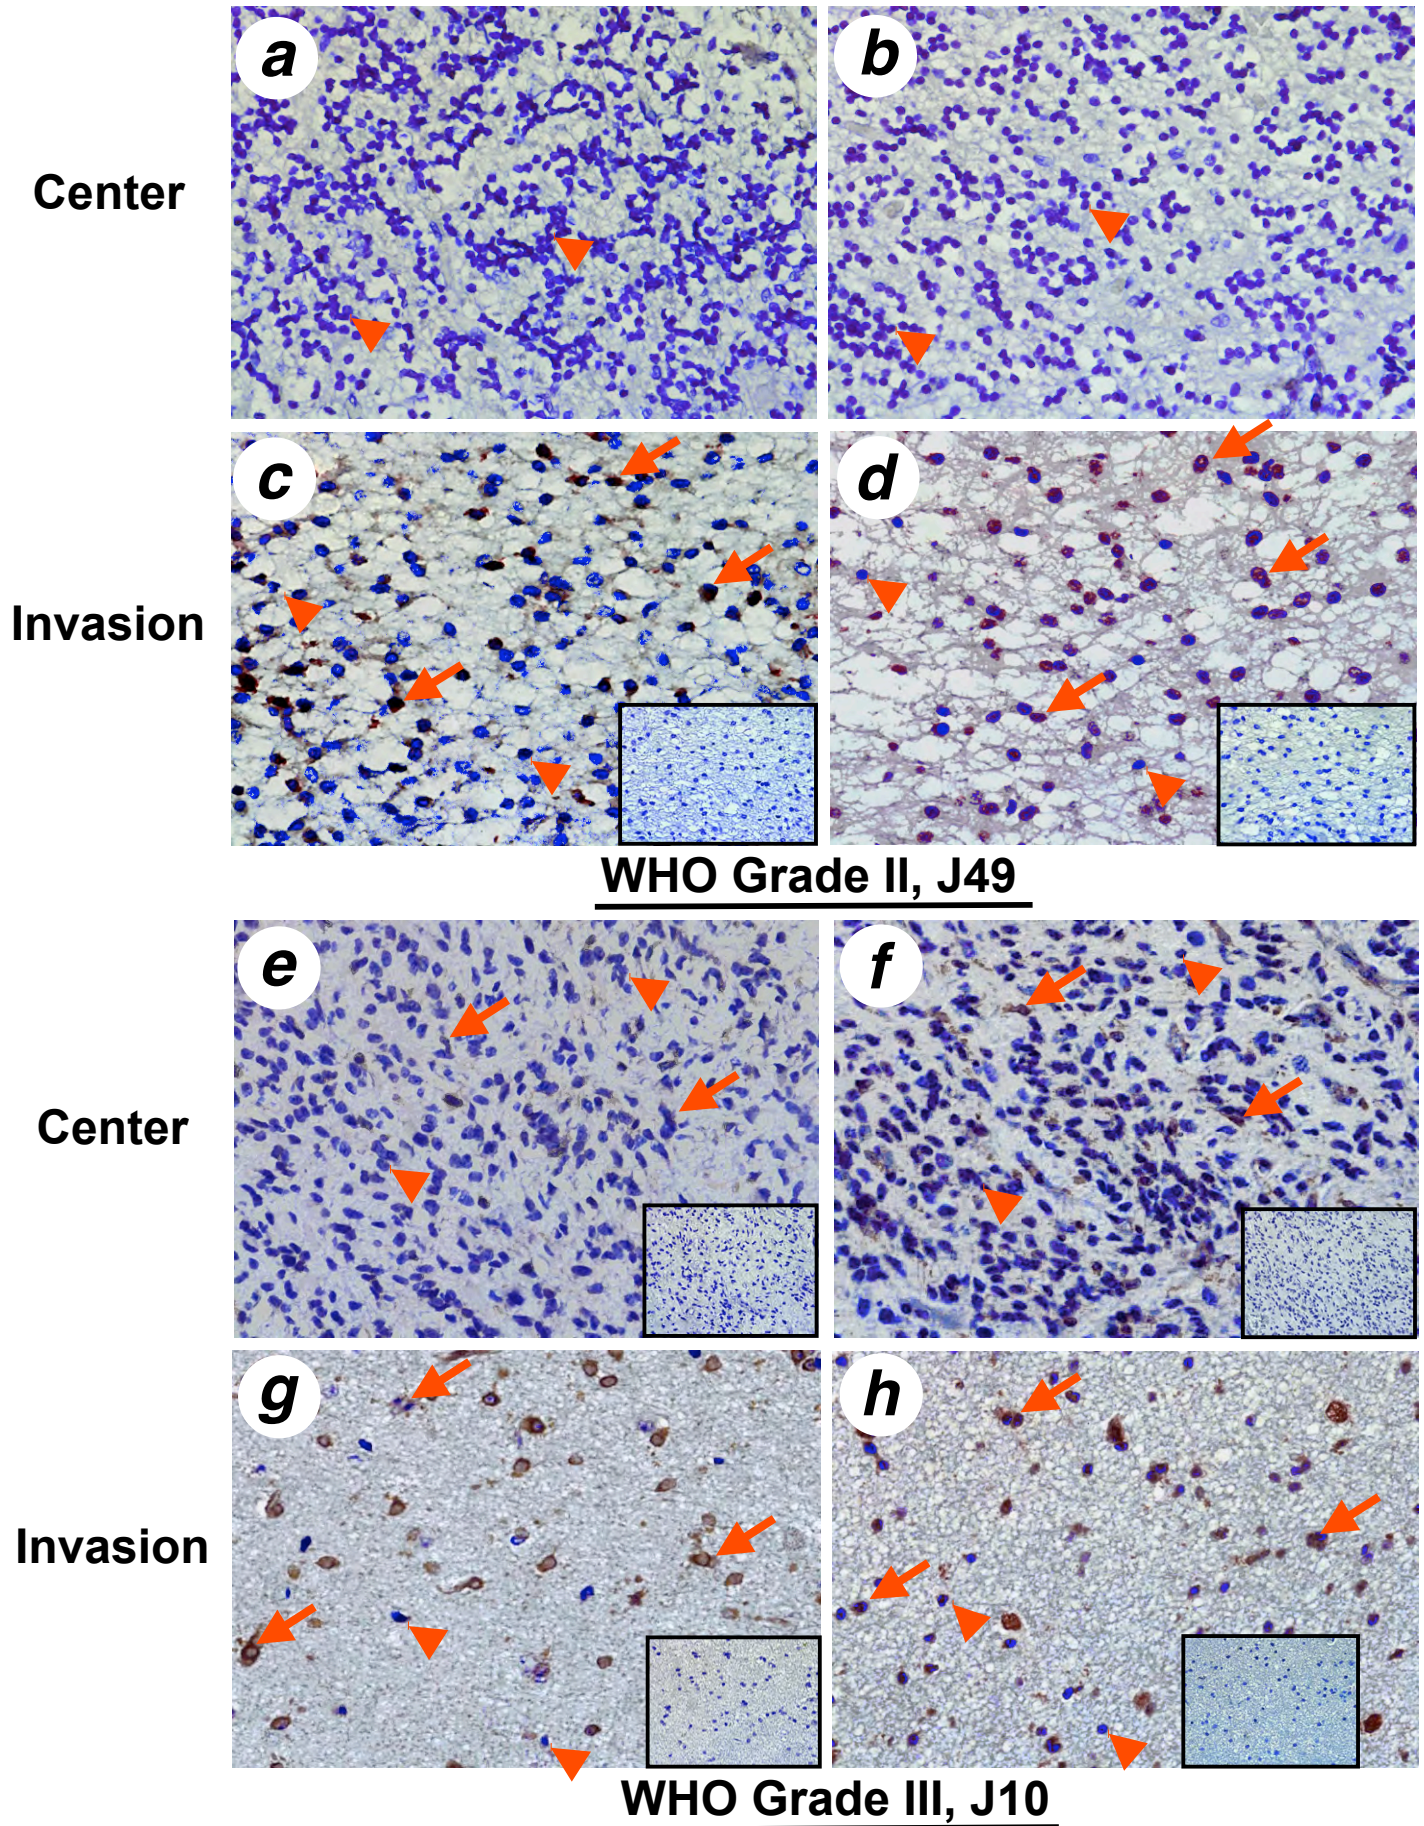

Supplement: NIHMS200299-supplement-supplement_1.pdf [file NIHMS200299-supplement-supplement_1.pdf]
